# Supplementary material
Source: PubMed Central journal article supplement (PMC8191575)
Supplement: NIHMS1710474-supplement-1.pdf [file NIHMS1710474-supplement-1.pdf]

**Table S1. Results for the association test between alpha diversity and genera from b**

|    |                     | <b>type</b> | <b>coeff</b> | <b>se(coeff)</b> | <b>z</b> | <b>HR</b> | <b>p</b> |
|----|---------------------|-------------|--------------|------------------|----------|-----------|----------|
| 1  |                     |             |              |                  |          |           |          |
| 2  |                     |             |              |                  |          |           |          |
| 3  |                     |             |              |                  |          |           |          |
| 4  |                     |             |              |                  |          |           |          |
| 5  |                     |             |              |                  |          |           |          |
| 6  |                     |             |              |                  |          |           |          |
| 7  | Cardiobacterium     | genus       | 0.4093       | 0.1872           | 2.1865   | 1.5057    | 0.0288   |
| 8  | Granulicatella      | genus       | 0.0220       | 0.0106           | 2.0830   | 1.0223    | 0.0373   |
| 9  | Veillonellaceae     | genus       | 0.0073       | 0.0044           | 1.6458   | 1.0073    | 0.0998   |
| 10 | Lautropia           | genus       | 0.0039       | 0.0026           | 1.5202   | 1.0039    | 0.1285   |
| 11 | Kingella            | genus       | 0.0154       | 0.0106           | 1.4547   | 1.0155    | 0.1457   |
| 12 | Rothia              | genus       | 0.0014       | 0.0010           | 1.3594   | 1.0014    | 0.1740   |
| 13 | Shannon             | alpha       | 0.7136       | 0.5394           | 1.3231   | 2.0414    | 0.1858   |
| 14 | Veillonella         | genus       | 0.0012       | 0.0010           | 1.2556   | 1.0012    | 0.2092   |
| 15 | Haemophilus         | genus       | -0.0010      | 0.0009           | -1.1871  | 0.9990    | 0.2352   |
| 16 | Oribacterium        | genus       | 0.0716       | 0.0613           | 1.1667   | 1.0742    | 0.2433   |
| 17 | Actinomyces         | genus       | 0.0144       | 0.0130           | 1.1079   | 1.0145    | 0.2679   |
| 18 | Spirochaetaceae     | genus       | 0.0439       | 0.0479           | 0.9147   | 1.0448    | 0.3604   |
| 19 | Chloroplast         | genus       | 0.0018       | 0.0024           | 0.7598   | 1.0018    | 0.4474   |
| 20 | Porphyromonadaceae  | genus       | 0.0169       | 0.0240           | 0.7062   | 1.0171    | 0.4801   |
| 21 | Corynebacterium     | genus       | 0.0063       | 0.0095           | 0.6612   | 1.0063    | 0.5085   |
| 22 | Leptotrichia        | genus       | 0.0064       | 0.0110           | 0.5794   | 1.0064    | 0.5623   |
| 23 | Abiotrophia         | genus       | 0.0702       | 0.1225           | 0.5726   | 1.0727    | 0.5669   |
| 24 | Streptococcus       | genus       | -0.0001      | 0.0003           | -0.5608  | 0.9999    | 0.5749   |
| 25 | Atopobium           | genus       | 0.0149       | 0.0284           | 0.5230   | 1.0150    | 0.6010   |
| 26 | Campylobacter       | genus       | 0.0055       | 0.0106           | 0.5160   | 1.0055    | 0.6058   |
| 27 | Mycoplasma          | genus       | -0.0080      | 0.0166           | -0.4813  | 0.9920    | 0.6303   |
| 28 | Gemella             | genus       | -0.0009      | 0.0030           | -0.3186  | 0.9991    | 0.7500   |
| 29 | Alloprevotella      | genus       | -0.0012      | 0.0038           | -0.3083  | 0.9988    | 0.7578   |
| 30 | Dialister           | genus       | 0.0032       | 0.0120           | 0.2680   | 1.0032    | 0.7887   |
| 31 | Prevotella          | genus       | -0.0006      | 0.0023           | -0.2533  | 0.9994    | 0.8000   |
| 32 | Peptostreptococcus  | genus       | 0.0249       | 0.0998           | 0.2493   | 1.0252    | 0.8032   |
| 33 | Fusobacterium       | genus       | -0.0001      | 0.0005           | -0.2267  | 0.9999    | 0.8206   |
| 34 | Bergeyella          | genus       | 0.0086       | 0.0431           | 0.1996   | 1.0086    | 0.8418   |
| 35 | Capnocytophaga      | genus       | 0.0045       | 0.0250           | 0.1792   | 1.0045    | 0.8578   |
| 36 | Neisseria           | genus       | -0.0004      | 0.0034           | -0.1211  | 0.9996    | 0.9036   |
| 37 | Lachnoanaerobaculum | genus       | 0.0279       | 0.2437           | 0.1147   | 1.0283    | 0.9087   |
| 38 | Porphyromonas       | genus       | 0.0019       | 0.0236           | 0.0815   | 1.0019    | 0.9351   |
| 39 | Megasphaera         | genus       | 0.0062       | 0.0853           | 0.0724   | 1.0062    | 0.9422   |
| 40 | Tannerella          | genus       | 0.0062       | 0.0872           | 0.0713   | 1.0062    | 0.9431   |
| 41 | Staphylococcus      | genus       | 0.0002       | 0.0032           | 0.0660   | 1.0002    | 0.9474   |
| 42 | Selenomonas         | genus       | 0.0124       | 0.2664           | 0.0467   | 1.0125    | 0.9627   |
| 43 | Parvimonas          | genus       | -0.0004      | 0.0175           | -0.0248  | 0.9996    | 0.9802   |
| 44 | Prevotellaceae      | genus       | 0.0000       | 0.0018           | -0.0113  | 1.0000    | 0.9910   |
| 45 |                     |             |              |                  |          |           |          |
| 46 |                     |             |              |                  |          |           |          |
| 47 |                     |             |              |                  |          |           |          |
| 48 |                     |             |              |                  |          |           |          |
| 49 |                     |             |              |                  |          |           |          |
| 50 |                     |             |              |                  |          |           |          |
| 51 |                     |             |              |                  |          |           |          |
| 52 |                     |             |              |                  |          |           |          |
| 53 |                     |             |              |                  |          |           |          |
| 54 |                     |             |              |                  |          |           |          |
| 55 |                     |             |              |                  |          |           |          |
| 56 |                     |             |              |                  |          |           |          |
| 57 |                     |             |              |                  |          |           |          |
| 58 |                     |             |              |                  |          |           |          |
| 59 |                     |             |              |                  |          |           |          |
| 60 |                     |             |              |                  |          |           |          |

1  
2 **baseline samples and time to onset of severe oral mucositis**  
3  
4  
5  
6  
7  
8  
9  
10  
11  
12  
13  
14  
15  
16  
17  
18  
19  
20  
21  
22  
23  
24  
25  
26  
27  
28  
29  
30  
31  
32  
33  
34  
35  
36  
37  
38  
39  
40  
41  
42  
43  
44  
45  
46  
47  
48  
49  
50  
51  
52  
53  
54  
55  
56  
57  
58  
59  
60

**Table S2. Results for the association test between alpha diversity and genera f**

|    | type                | coeff | se(coeff) | z      | HR      | p      |        |
|----|---------------------|-------|-----------|--------|---------|--------|--------|
| 1  |                     |       |           |        |         |        |        |
| 2  |                     |       |           |        |         |        |        |
| 3  |                     |       |           |        |         |        |        |
| 4  |                     |       |           |        |         |        |        |
| 5  |                     |       |           |        |         |        |        |
| 6  |                     |       |           |        |         |        |        |
| 7  | Streptococcus       | genus | -0.0010   | 0.0004 | -2.4610 | 0.9990 | 0.0139 |
| 8  | Prevotella          | genus | 0.0080    | 0.0036 | 2.1834  | 1.0080 | 0.0290 |
| 9  | Fusobacterium       | genus | 0.0023    | 0.0011 | 2.1132  | 1.0023 | 0.0346 |
| 10 | Atopobium           | genus | 0.0765    | 0.0391 | 1.9555  | 1.0795 | 0.0505 |
| 11 | Prevotellaceae      | genus | 0.0010    | 0.0006 | 1.7018  | 1.0010 | 0.0888 |
| 12 | Oribacterium        | genus | 0.1628    | 0.1107 | 1.4707  | 1.1768 | 0.1414 |
| 13 | Haemophilus         | genus | 0.0007    | 0.0005 | 1.4141  | 1.0007 | 0.1573 |
| 14 | Spirochaetaceae     | genus | 0.0627    | 0.0476 | 1.3194  | 1.0647 | 0.1870 |
| 15 | Cardiobacterium     | genus | 0.0203    | 0.0167 | 1.2126  | 1.0205 | 0.2253 |
| 16 | Lachnoanaerobaculum | genus | 0.0781    | 0.0688 | 1.1353  | 1.0812 | 0.2563 |
| 17 | Shannon             | alpha | 0.8480    | 0.7948 | 1.0669  | 2.3349 | 0.2860 |
| 18 | Dialister           | genus | 0.0205    | 0.0220 | 0.9330  | 1.0207 | 0.3508 |
| 19 | Parvimonas          | genus | 0.0229    | 0.0328 | 0.6976  | 1.0231 | 0.4854 |
| 20 | Abiotrophia         | genus | -0.0224   | 0.0346 | -0.6472 | 0.9779 | 0.5175 |
| 21 | Veillonella         | genus | 0.0015    | 0.0024 | 0.6357  | 1.0015 | 0.5250 |
| 22 | Granulicatella      | genus | 0.0055    | 0.0095 | 0.5778  | 1.0055 | 0.5634 |
| 23 | Bergeyella          | genus | 0.0074    | 0.0134 | 0.5534  | 1.0075 | 0.5800 |
| 24 | Rothia              | genus | -0.0002   | 0.0004 | -0.5439 | 0.9998 | 0.5865 |
| 25 | Kingella            | genus | 0.0280    | 0.0598 | 0.4691  | 1.0284 | 0.6390 |
| 26 | Corynebacterium     | genus | 0.0632    | 0.1506 | 0.4197  | 1.0652 | 0.6747 |
| 27 | Capnocytophaga      | genus | 0.0009    | 0.0025 | 0.3717  | 1.0009 | 0.7101 |
| 28 | Campylobacter       | genus | 0.0037    | 0.0107 | 0.3405  | 1.0037 | 0.7335 |
| 29 | Actinomyces         | genus | 0.0042    | 0.0133 | 0.3181  | 1.0042 | 0.7504 |
| 30 | Veillonellaceae     | genus | 0.0185    | 0.0683 | 0.2705  | 1.0186 | 0.7867 |
| 31 | Chloroplast         | genus | -0.0059   | 0.0328 | -0.1801 | 0.9941 | 0.8571 |
| 32 | Porphyromonas       | genus | -0.0040   | 0.0225 | -0.1789 | 0.9960 | 0.8580 |
| 33 | Tannerella          | genus | 0.0071    | 0.0464 | 0.1531  | 1.0071 | 0.8783 |
| 34 | Gemella             | genus | -0.0002   | 0.0019 | -0.0994 | 0.9998 | 0.9208 |
| 35 | Staphylococcus      | genus | -0.0002   | 0.0027 | -0.0861 | 0.9998 | 0.9314 |
| 36 | Leptotrichia        | genus | -0.0001   | 0.0011 | -0.0851 | 0.9999 | 0.9322 |
| 37 | Peptostreptococcus  | genus | 0.0302    | 0.3855 | 0.0782  | 1.0306 | 0.9376 |
| 38 | Alloprevotella      | genus | -0.0008   | 0.0106 | -0.0776 | 0.9992 | 0.9381 |
| 39 | Selenomonas         | genus | 0.0202    | 0.3621 | 0.0558  | 1.0204 | 0.9555 |
| 40 | Porphyromonadaceae  | genus | 0.0028    | 0.0705 | 0.0404  | 1.0029 | 0.9678 |
| 41 | Megasphaera         | genus | 0.0030    | 0.0829 | 0.0368  | 1.0031 | 0.9707 |
| 42 | Neisseria           | genus | 0.0000    | 0.0005 | 0.0355  | 1.0000 | 0.9717 |
| 43 | Lautropia           | genus | 0.0000    | 0.0025 | -0.0071 | 1.0000 | 0.9943 |
| 44 | Mycoplasma          | genus | 0.0002    | 0.0487 | 0.0048  | 1.0002 | 0.9962 |
| 45 |                     |       |           |        |         |        |        |
| 46 |                     |       |           |        |         |        |        |
| 47 |                     |       |           |        |         |        |        |
| 48 |                     |       |           |        |         |        |        |
| 49 |                     |       |           |        |         |        |        |
| 50 |                     |       |           |        |         |        |        |
| 51 |                     |       |           |        |         |        |        |
| 52 |                     |       |           |        |         |        |        |
| 53 |                     |       |           |        |         |        |        |
| 54 |                     |       |           |        |         |        |        |
| 55 |                     |       |           |        |         |        |        |
| 56 |                     |       |           |        |         |        |        |
| 57 |                     |       |           |        |         |        |        |
| 58 |                     |       |           |        |         |        |        |
| 59 |                     |       |           |        |         |        |        |
| 60 |                     |       |           |        |         |        |        |

1  
2  
3  
4  
5  
6  
7  
8  
9  
10  
11  
12  
13  
14  
15  
16  
17  
18  
19  
20  
21  
22  
23  
24  
25  
26  
27  
28  
29  
30  
31  
32  
33  
34  
35  
36  
37  
38  
39  
40  
41  
42  
43  
44  
45  
46  
47  
48  
49  
50  
51  
52  
53  
54  
55  
56  
57  
58  
59  
60

**from samples collected immediately prior to development of oral mucositis and**

1  
2  
3  
4  
5  
6  
7  
8  
9  
10  
11  
12  
13  
14  
15  
16  
17  
18  
19  
20  
21  
22  
23  
24  
25  
26  
27  
28  
29  
30  
31  
32  
33  
34  
35  
36  
37  
38  
39  
40  
41  
42  
43  
44  
45  
46  
47  
48  
49  
50  
51  
52  
53  
54  
55  
56  
57  
58  
59  
60

**d time to onset of severe oral mucositis**

1 **Table S3. Results for the association test between alpha diversity and genera from samples collected immediately prior to development of severe oral mucositis and time to onset of severe oral mucositis**

|    | type                | coeff   | se(coeff) | z       | HR     | p      |
|----|---------------------|---------|-----------|---------|--------|--------|
| 4  | Megasphaera         | 0.2411  | 0.0629    | 3.8363  | 1.2727 | 0.0001 |
| 5  | genus               | 0.2411  | 0.0629    | 3.8363  | 1.2727 | 0.0001 |
| 6  | Cardiobacterium     | 0.1845  | 0.0847    | 2.1787  | 1.2026 | 0.0294 |
| 7  | genus               | 0.1845  | 0.0847    | 2.1787  | 1.2026 | 0.0294 |
| 8  | Atopobium           | 0.0525  | 0.0284    | 1.8473  | 1.0539 | 0.0647 |
| 9  | genus               | 0.0525  | 0.0284    | 1.8473  | 1.0539 | 0.0647 |
| 10 | Veillonellaceae     | 0.0500  | 0.0337    | 1.4836  | 1.0513 | 0.1379 |
| 11 | genus               | 0.0500  | 0.0337    | 1.4836  | 1.0513 | 0.1379 |
| 12 | Lautropia           | 0.0064  | 0.0045    | 1.4341  | 1.0064 | 0.1515 |
| 13 | genus               | 0.0064  | 0.0045    | 1.4341  | 1.0064 | 0.1515 |
| 14 | Prevotellaceae      | 0.0033  | 0.0024    | 1.3741  | 1.0033 | 0.1694 |
| 15 | genus               | 0.0033  | 0.0024    | 1.3741  | 1.0033 | 0.1694 |
| 16 | Fusobacterium       | 0.0023  | 0.0018    | 1.3126  | 1.0023 | 0.1893 |
| 17 | genus               | 0.0023  | 0.0018    | 1.3126  | 1.0023 | 0.1893 |
| 18 | Dialister           | 0.0116  | 0.0089    | 1.2994  | 1.0116 | 0.1938 |
| 19 | genus               | 0.0116  | 0.0089    | 1.2994  | 1.0116 | 0.1938 |
| 20 | Spirochaetaceae     | 0.0761  | 0.0747    | 1.0198  | 1.0791 | 0.3078 |
| 21 | genus               | 0.0761  | 0.0747    | 1.0198  | 1.0791 | 0.3078 |
| 22 | Campylobacter       | 0.0101  | 0.0110    | 0.9183  | 1.0102 | 0.3584 |
| 23 | genus               | 0.0101  | 0.0110    | 0.9183  | 1.0102 | 0.3584 |
| 24 | Lachnoanaerobaculum | 0.2390  | 0.2681    | 0.8915  | 1.2700 | 0.3727 |
| 25 | genus               | 0.2390  | 0.2681    | 0.8915  | 1.2700 | 0.3727 |
| 26 | Veillonella         | -0.0005 | 0.0008    | -0.6304 | 0.9995 | 0.5284 |
| 27 | genus               | -0.0005 | 0.0008    | -0.6304 | 0.9995 | 0.5284 |
| 28 | Abiotrophia         | -0.0379 | 0.0658    | -0.5756 | 0.9629 | 0.5649 |
| 29 | genus               | -0.0379 | 0.0658    | -0.5756 | 0.9629 | 0.5649 |
| 30 | Shannon             | 0.5487  | 0.9799    | 0.5600  | 1.7310 | 0.5755 |
| 31 | genus               | 0.5487  | 0.9799    | 0.5600  | 1.7310 | 0.5755 |
| 32 | Capnocytophaga      | 0.0026  | 0.0046    | 0.5562  | 1.0026 | 0.5781 |
| 33 | genus               | 0.0026  | 0.0046    | 0.5562  | 1.0026 | 0.5781 |
| 34 | Chloroplast         | -0.1046 | 0.2079    | -0.5031 | 0.9007 | 0.6149 |
| 35 | genus               | -0.1046 | 0.2079    | -0.5031 | 0.9007 | 0.6149 |
| 36 | Streptococcus       | -0.0002 | 0.0004    | -0.4886 | 0.9998 | 0.6252 |
| 37 | genus               | -0.0002 | 0.0004    | -0.4886 | 0.9998 | 0.6252 |
| 38 | Gemella             | 0.0009  | 0.0018    | 0.4678  | 1.0009 | 0.6399 |
| 39 | genus               | 0.0009  | 0.0018    | 0.4678  | 1.0009 | 0.6399 |
| 40 | Neisseria           | 0.0010  | 0.0024    | 0.4139  | 1.0010 | 0.6789 |
| 41 | genus               | 0.0010  | 0.0024    | 0.4139  | 1.0010 | 0.6789 |
| 42 | Prevotella          | -0.0025 | 0.0037    | -0.3756 | 1.0014 | 0.7072 |
| 43 | genus               | -0.0025 | 0.0037    | -0.3756 | 1.0014 | 0.7072 |
| 44 | Granulicatella      | 0.0083  | 0.0245    | 0.3404  | 1.0084 | 0.7336 |
| 45 | genus               | 0.0083  | 0.0245    | 0.3404  | 1.0084 | 0.7336 |
| 46 | Alloprevotella      | 0.0646  | 0.2455    | 0.2631  | 1.0667 | 0.7925 |
| 47 | genus               | 0.0646  | 0.2455    | 0.2631  | 1.0667 | 0.7925 |
| 48 | Oribacterium        | 0.0867  | 0.3537    | 0.2450  | 1.0905 | 0.8065 |
| 49 | genus               | 0.0867  | 0.3537    | 0.2450  | 1.0905 | 0.8065 |
| 50 | Peptostreptococcus  | 0.0296  | 0.1279    | 0.2316  | 1.0301 | 0.8169 |
| 51 | genus               | 0.0296  | 0.1279    | 0.2316  | 1.0301 | 0.8169 |
| 52 | Selenomonas         | 0.0654  | 0.2847    | 0.2296  | 1.0675 | 0.8184 |
| 53 | genus               | 0.0654  | 0.2847    | 0.2296  | 1.0675 | 0.8184 |
| 54 | Tannerella          | 0.0064  | 0.0344    | 0.1864  | 1.0064 | 0.8521 |
| 55 | genus               | 0.0064  | 0.0344    | 0.1864  | 1.0064 | 0.8521 |
| 56 | Actinomyces         | 0.0376  | 0.2198    | 0.1710  | 1.0383 | 0.8642 |
| 57 | genus               | 0.0376  | 0.2198    | 0.1710  | 1.0383 | 0.8642 |
| 58 | Bergeyella          | 0.0061  | 0.0435    | 0.1402  | 1.0061 | 0.8885 |
| 59 | genus               | 0.0061  | 0.0435    | 0.1402  | 1.0061 | 0.8885 |
| 60 | Kingella            | 0.0079  | 0.0716    | 0.1102  | 1.0079 | 0.9123 |
| 61 | genus               | 0.0079  | 0.0716    | 0.1102  | 1.0079 | 0.9123 |
| 62 | Parvimonas          | 0.0042  | 0.0386    | 0.1077  | 1.0042 | 0.9142 |
| 63 | genus               | 0.0042  | 0.0386    | 0.1077  | 1.0042 | 0.9142 |
| 64 | Corynebacterium     | -0.0177 | 0.1903    | -0.0932 | 0.9824 | 0.9258 |
| 65 | genus               | -0.0177 | 0.1903    | -0.0932 | 0.9824 | 0.9258 |
| 66 | Porphyromonadaceae  | -0.0061 | 0.0860    | -0.0705 | 0.9940 | 0.9438 |
| 67 | genus               | -0.0061 | 0.0860    | -0.0705 | 0.9940 | 0.9438 |
| 68 | Haemophilus         | 0.0000  | 0.0002    | -0.0587 | 1.0000 | 0.9532 |
| 69 | genus               | 0.0000  | 0.0002    | -0.0587 | 1.0000 | 0.9532 |
| 70 | Rothia              | -0.0002 | 0.0044    | -0.0433 | 0.9998 | 0.9654 |
| 71 | genus               | -0.0002 | 0.0044    | -0.0433 | 0.9998 | 0.9654 |
| 72 | Staphylococcus      | -0.0019 | 0.0545    | -0.0351 | 0.9981 | 0.9720 |
| 73 | genus               | -0.0019 | 0.0545    | -0.0351 | 0.9981 | 0.9720 |
| 74 | Leptotrichia        | -0.0006 | 0.0273    | -0.0214 | 0.9994 | 0.9829 |
| 75 | genus               | -0.0006 | 0.0273    | -0.0214 | 0.9994 | 0.9829 |
| 76 | Mycoplasma          | 0.0002  | 0.0859    | 0.0022  | 1.0002 | 0.9982 |
| 77 | genus               | 0.0002  | 0.0859    | 0.0022  | 1.0002 | 0.9982 |

36

37

38

39

40

41

42

43

44

45

46

**Table S4. Results for the association test between  $\beta$ -diversities and time to on:**

|                                |                         | <b>coeff</b> | <b>se(coeff)</b> | <b>z</b> | <b>p</b> |
|--------------------------------|-------------------------|--------------|------------------|----------|----------|
|                                | <b>Bray-Curtis</b>      | -1.6893      | 2.7442           | -0.6156  | 0.5382   |
| $\beta_{OM}$ -baseline         | <b>UniFrac</b>          | 0.3858       | 2.1501           | 0.1794   | 0.8576   |
|                                | <b>weighted UniFrac</b> | -1.9709      | 2.4771           | -0.7957  | 0.4262   |
|                                | <b>Bray-Curtis</b>      | -0.3021      | 1.7828           | -0.1694  | 0.8655   |
| $\beta_{severe\_OM}$ -baseline | <b>UniFrac</b>          | -1.2117      | 3.1887           | -0.3800  | 0.7039   |
|                                | <b>weighted UniFrac</b> | 1.7545       | 3.2707           | 0.5364   | 0.5917   |

1  
2  
3  
4  
5  
6  
7  
8  
9  
10  
11  
12  
13  
14  
15  
16  
17  
18  
19  
20  
21  
22  
23  
24  
25  
26  
27  
28  
29  
30  
31  
32  
33  
34  
35  
36  
37  
38  
39  
40  
41  
42  
43  
44  
45  
46  
47  
48  
49  
50  
51  
52  
53  
54  
55  
56  
57  
58  
59  
60

1  
2  
3  
4  
5  
6  
7  
8  
9  
10  
11  
12  
13  
14  
15  
16  
17  
18  
19  
20  
21  
22  
23  
24  
25  
26  
27  
28  
29  
30  
31  
32  
33  
34  
35  
36  
37  
38  
39  
40  
41  
42  
43  
44  
45  
46  
47  
48  
49  
50  
51  
52  
53  
54  
55  
56  
57  
58  
59  
60

**set of severe oral mucositis**
